# Supplementary material
Source: bioRxiv or medRxiv preprint supplement (https://www.biorxiv.org/highwire/filestream/83314/field_highwire_adjunct_files/2/271361-3.pdf)
Supplement: Supplementary file [file 271361-3.pdf]

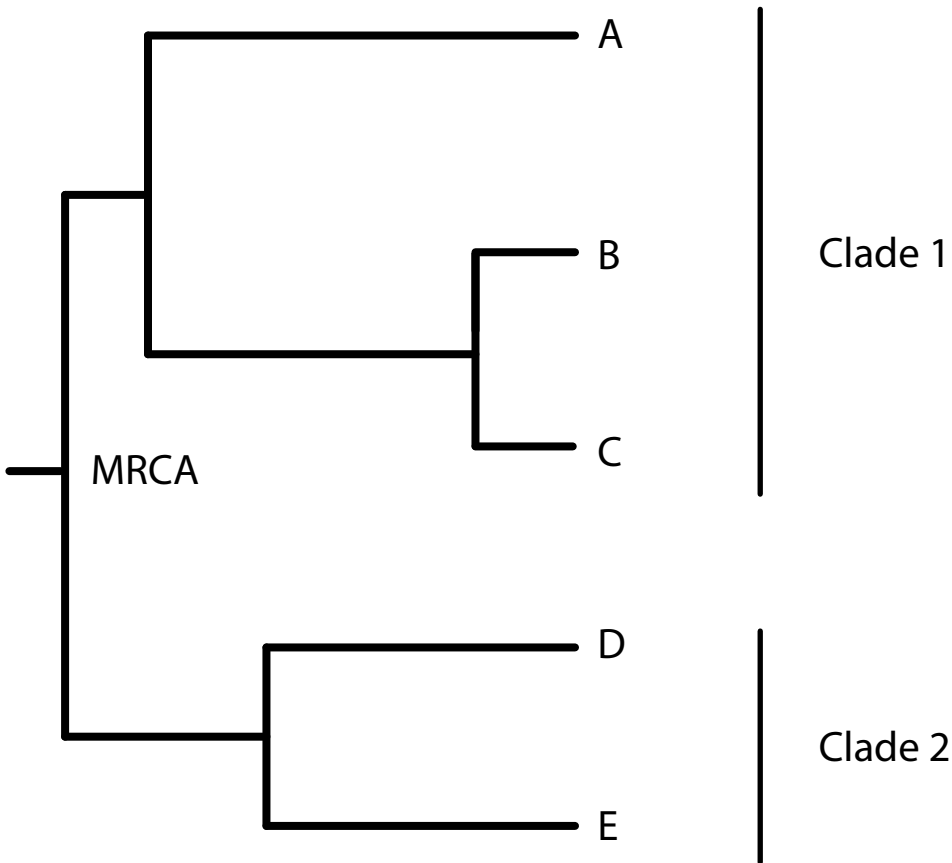

$$CSCS_{mrca} = \text{mean}(CSCS_{AD'}, CSCS_{AE'}, CSCS_{BD'}, CSCS_{BE'}, CSCS_{CD'}, CSCS_{CE'})$$
